# Supplementary material
Source: Springer Nature journal article supplement (https://www.springermedizin.de/resource/supplementary/13229_2013_105_MOESM2_ESM.pdf/9676270)

# Supplementary Figure 1a – Examples of Haplotype-Sharing Analysis

Haplotype-sharing regions on chromosome 2  
where no significant variants were found

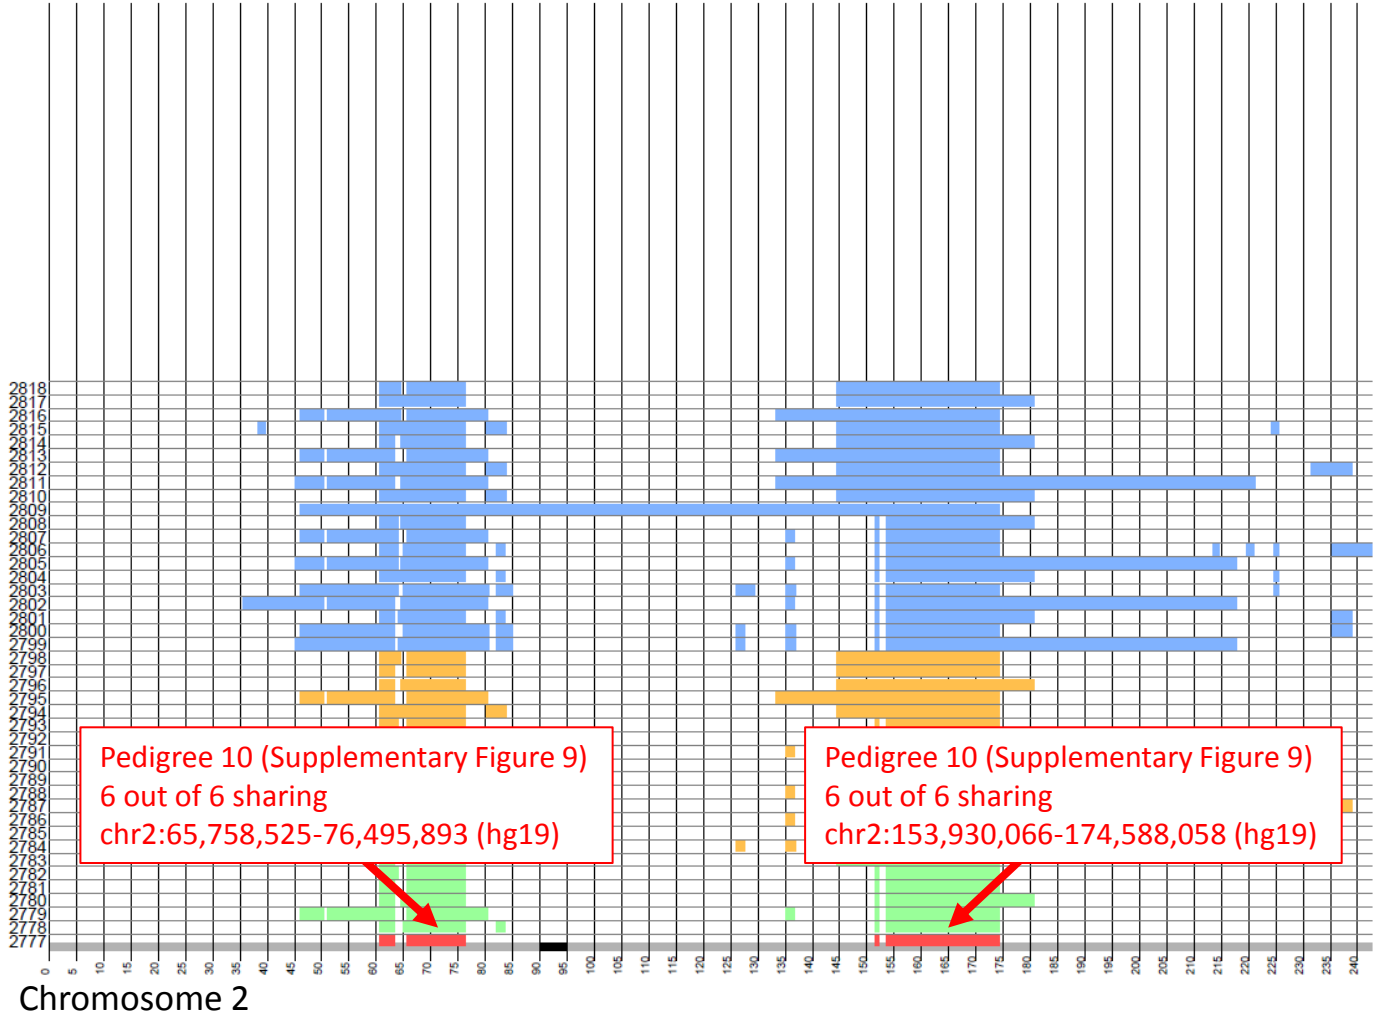

# Supplementary Figure 1b – continued

Haplotype-sharing region on chromosome 14  
where no significant variants were found

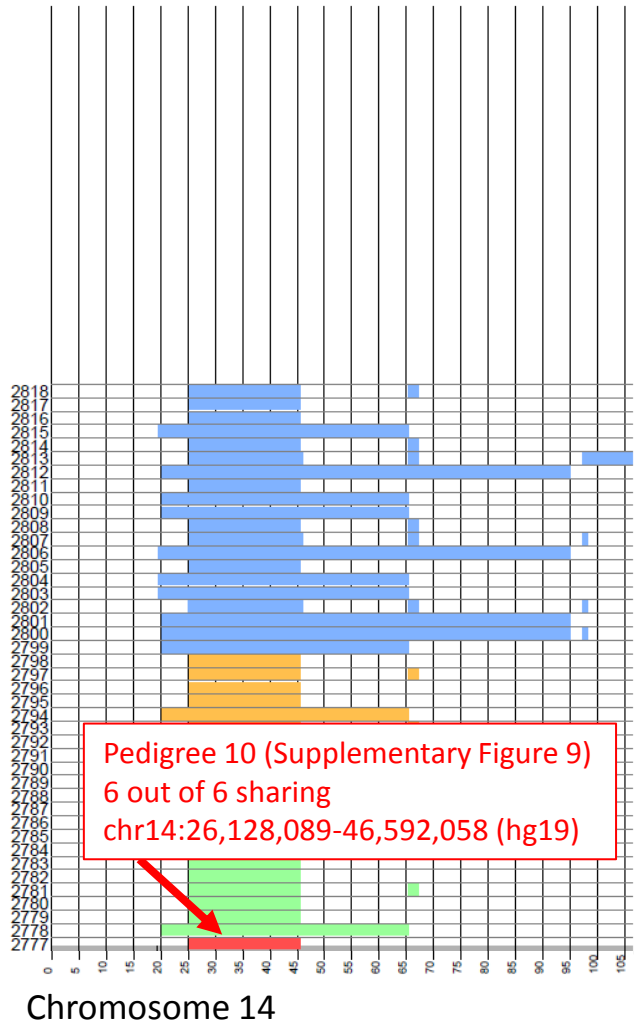

# Supplementary Figure 1c – Examples of Haplotype-Sharing Analysis

### Haplotype-sharing region containing AKAP9 variant (chr7:91,724,455)

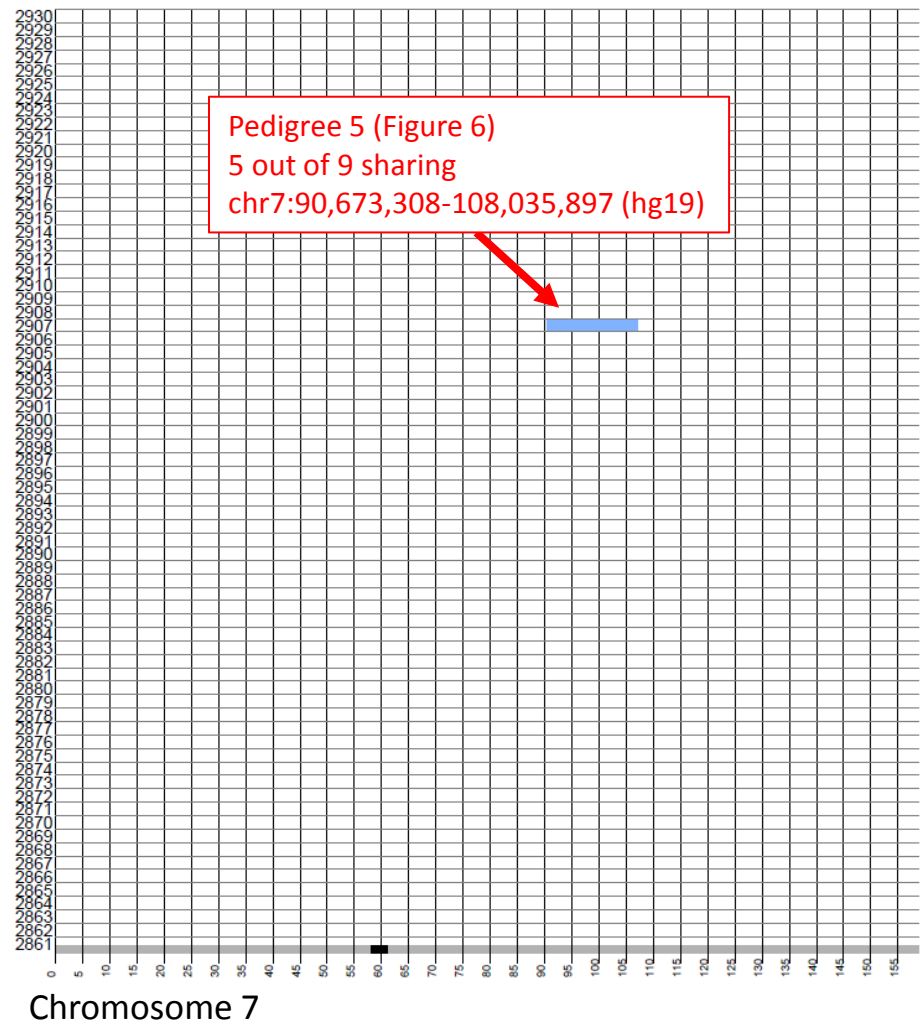

### Haplotype-sharing region containing DEFB124 variant (chr20:30,053,379)

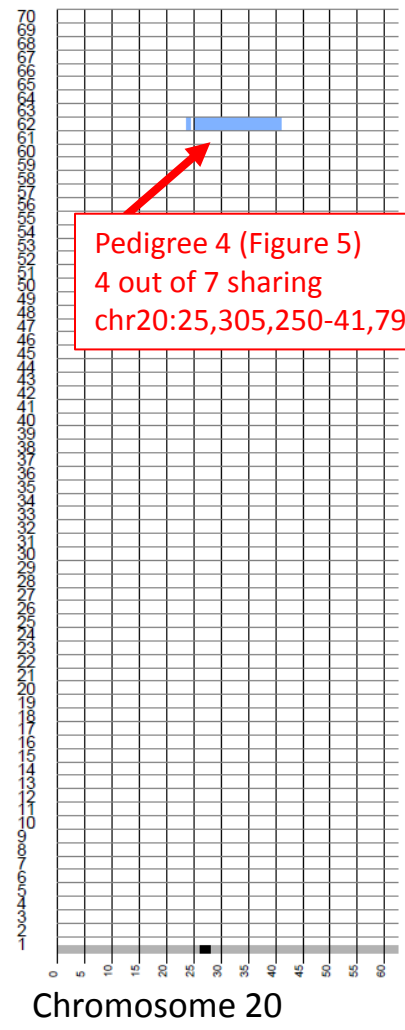

Supplement: MOESM2 [file 9676270]
